# Supplementary material
Source: PubMed Central journal article supplement (PMC8516119)
Supplement: NIHMS1641863-supplement-Supplementary_material.pdf [file NIHMS1641863-supplement-Supplementary_material.pdf]

## Supplementary materials

### Appendix A. Flowchart of inclusion and exclusion criteria for study population

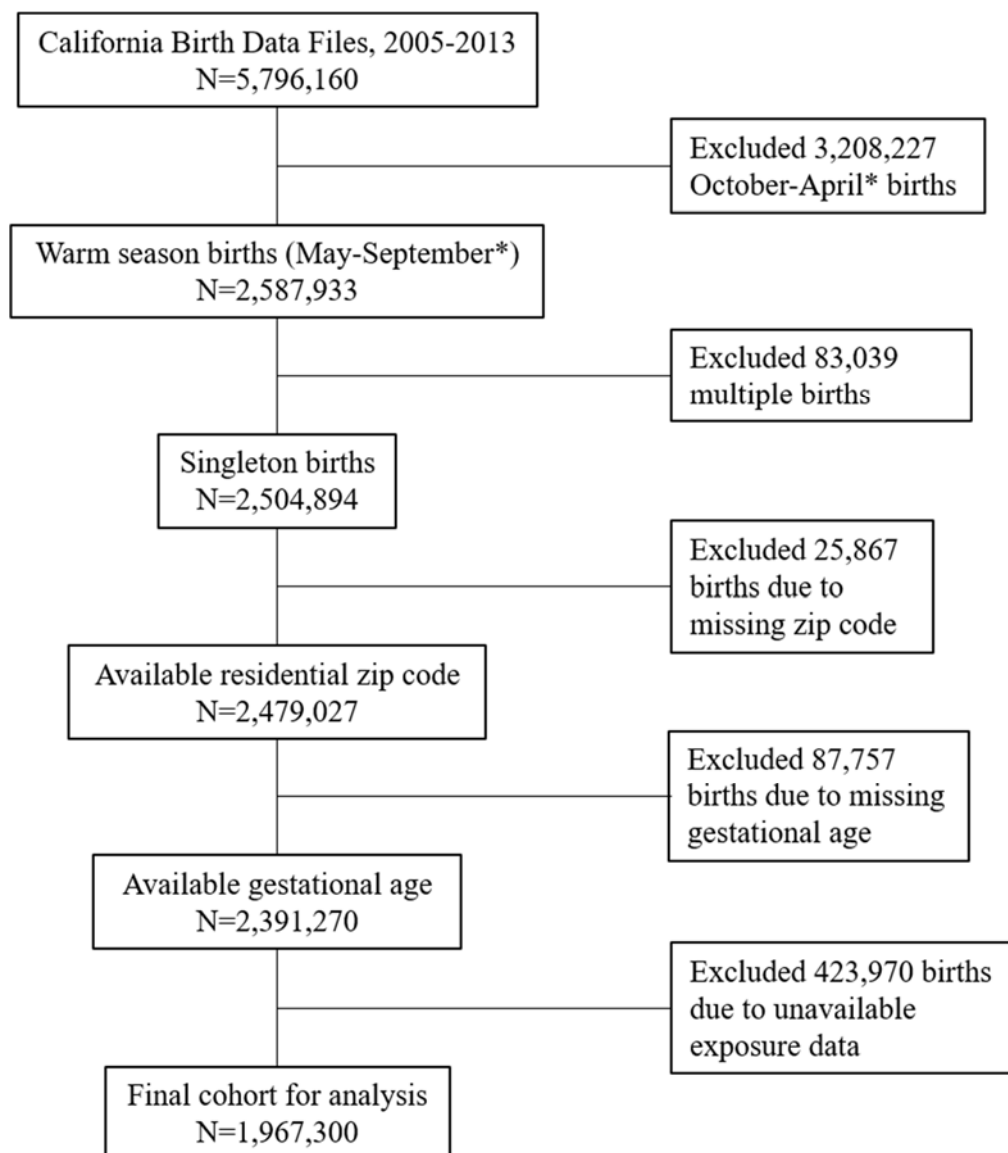

\*Births first week of October were included in this analysis (censored outcomes) to capture women at risk for preterm birth the last week of September.

**Appendix B. PM<sub>10</sub> and NO<sub>2</sub> concentrations in California (May-September, 2005-2013) and RERI of heatwave and PM<sub>10</sub>, NO<sub>2</sub> on preterm birth.**

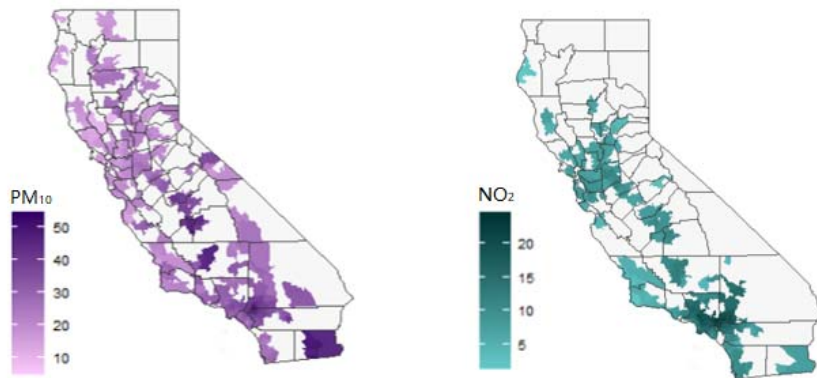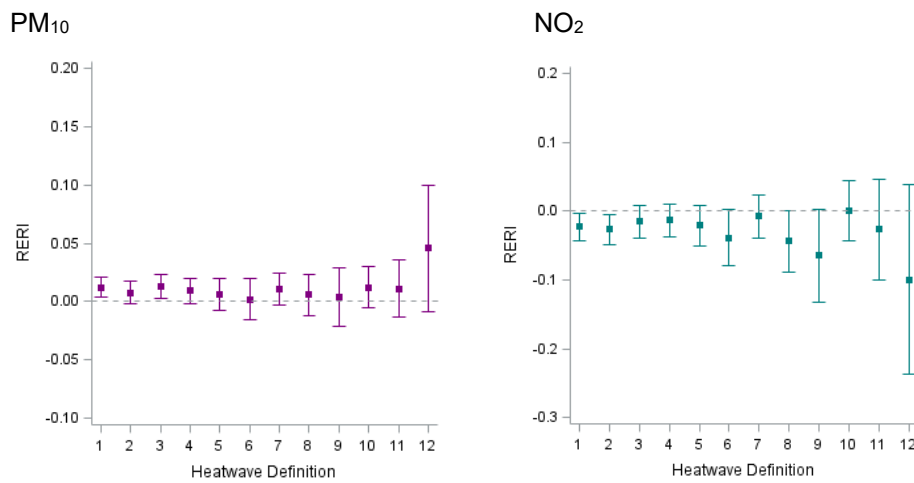

Number of zip codes: PM<sub>10</sub>:1287; NO<sub>2</sub>:1128.

RERI: Relative excess risks due to interaction.

All models adjusted for maternal age, race/ethnicity, education, insurance, parity, infant sex, season; maternal residential ZIP code was fitted as a random effect.

RERI calculated for 10  $\mu\text{g}/\text{m}^3$  increase in PM<sub>10</sub>; 10 parts per billion (ppb) increase in NO<sub>2</sub>.

**Appendix C. HRs and RERI of heatwave and air pollution, NDVI inverse on preterm birth in California, 2005-2013.**

| <b>Heatwave Definition</b> | <b>HR<sub>11</sub></b> | <b>HR<sub>10</sub></b> | <b>HR<sub>01</sub></b> | <b>HR<sub>00</sub></b> | <b>RERI (95% CI)</b>    |
|----------------------------|------------------------|------------------------|------------------------|------------------------|-------------------------|
| <b>PM<sub>2.5</sub></b>    |                        |                        |                        |                        |                         |
| HWD1                       | 1.047                  | 0.956                  | 1.054                  | 1.00                   | 0.037 (0.012, 0.062)    |
| HWD2                       | 1.064                  | 0.974                  | 1.061                  | 1.00                   | 0.029 (0.0002, 0.058)   |
| HWD3                       | 1.065                  | 0.962                  | 1.061                  | 1.00                   | 0.043 (0.009, 0.076)    |
| HWD4                       | 1.061                  | 0.959                  | 1.060                  | 1.00                   | 0.042 (0.010, 0.075)    |
| HWD5                       | 1.085                  | 0.981                  | 1.063                  | 1.00                   | 0.041 (-0.002, 0.084)   |
| HWD6                       | 1.088                  | 0.984                  | 1.065                  | 1.00                   | 0.039 (-0.019, 0.098)   |
| HWD7                       | 1.074                  | 0.969                  | 1.063                  | 1.00                   | 0.042 (0.0003, 0.085)   |
| HWD8                       | 1.075                  | 0.978                  | 1.066                  | 1.00                   | 0.030 (-0.029, 0.090)   |
| HWD9                       | 1.084                  | 0.976                  | 1.067                  | 1.00                   | 0.041 (-0.057, 0.139)   |
| HWD10                      | 1.061                  | 0.963                  | 1.066                  | 1.00                   | 0.032 (-0.024, 0.088)   |
| HWD11                      | 1.125                  | 1.036                  | 1.067                  | 1.00                   | 0.023 (-0.070, 0.116)   |
| HWD12                      | 1.183                  | 1.048                  | 1.067                  | 1.00                   | 0.067 (-0.146, 0.280)   |
| <b>PM<sub>10</sub></b>     |                        |                        |                        |                        |                         |
| HWD1                       | 0.990                  | 0.959                  | 1.018                  | 1.00                   | 0.012 (0.003, 0.021)    |
| HWD2                       | 1.011                  | 0.983                  | 1.021                  | 1.00                   | 0.008 (-0.002, 0.017)   |
| HWD3                       | 1.004                  | 0.971                  | 1.020                  | 1.00                   | 0.013 (0.002, 0.024)    |
| HWD4                       | 1.012                  | 0.981                  | 1.021                  | 1.00                   | 0.010 (-0.001, 0.020)   |
| HWD5                       | 1.044                  | 1.016                  | 1.022                  | 1.00                   | 0.006 (-0.008, 0.019)   |
| HWD6                       | 1.061                  | 1.036                  | 1.023                  | 1.00                   | 0.002 (-0.016, 0.02)    |
| HWD7                       | 1.016                  | 0.983                  | 1.022                  | 1.00                   | 0.011 (-0.003, 0.024)   |
| HWD8                       | 1.025                  | 0.997                  | 1.023                  | 1.00                   | 0.006 (-0.012, 0.023)   |
| HWD9                       | 1.046                  | 1.019                  | 1.023                  | 1.00                   | 0.004 (-0.021, 0.029)   |
| HWD10                      | 0.995                  | 0.960                  | 1.023                  | 1.00                   | 0.012 (-0.005, 0.03)    |
| HWD11                      | 1.052                  | 1.018                  | 1.023                  | 1.00                   | 0.011 (-0.013, 0.035)   |
| HWD12                      | 1.023                  | 0.954                  | 1.023                  | 1.00                   | 0.046 (-0.008, 0.1)     |
| <b>O<sub>3</sub></b>       |                        |                        |                        |                        |                         |
| HWD1                       | 0.987                  | 0.940                  | 1.040                  | 1.00                   | 0.007 (-0.001, 0.014)   |
| HWD2                       | 0.996                  | 0.948                  | 1.041                  | 1.00                   | 0.007 (-0.001, 0.014)   |
| HWD3                       | 0.971                  | 0.920                  | 1.040                  | 1.00                   | 0.011 (0.003, 0.019)    |
| HWD4                       | 0.976                  | 0.925                  | 1.040                  | 1.00                   | 0.010 (0.002, 0.019)    |
| HWD5                       | 0.984                  | 0.932                  | 1.041                  | 1.00                   | 0.011 (0.001, 0.021)    |
| HWD6                       | 0.979                  | 0.926                  | 1.042                  | 1.00                   | 0.011 (-0.002, 0.024)   |
| HWD7                       | 0.927                  | 0.869                  | 1.040                  | 1.00                   | 0.018 (0.008, 0.027)    |
| HWD8                       | 0.965                  | 0.913                  | 1.043                  | 1.00                   | 0.010 (-0.004, 0.024)   |
| HWD9                       | 0.964                  | 0.911                  | 1.043                  | 1.00                   | 0.011 (-0.008, 0.030)   |
| HWD10                      | 0.848                  | 0.782                  | 1.041                  | 1.00                   | 0.025 (0.014, 0.036)    |
| HWD11                      | 0.902                  | 0.837                  | 1.042                  | 1.00                   | 0.023 (0.004, 0.041)    |
| HWD12                      | 1.080                  | 1.026                  | 1.042                  | 1.00                   | 0.012 (-0.033, 0.056)   |
| <b>NO<sub>2</sub></b>      |                        |                        |                        |                        |                         |
| HWD1                       | 1.086                  | 1.013                  | 1.097                  | 1.00                   | -0.023 (-0.043, -0.003) |
| HWD2                       | 1.098                  | 1.033                  | 1.092                  | 1.00                   | -0.027 (-0.048, -0.006) |
| HWD3                       | 1.096                  | 1.028                  | 1.084                  | 1.00                   | -0.015 (-0.04, 0.009)   |
| HWD4                       | 1.089                  | 1.018                  | 1.084                  | 1.00                   | -0.013 (-0.037, 0.01)   |
| HWD5                       | 1.114                  | 1.054                  | 1.081                  | 1.00                   | -0.021 (-0.051, 0.009)  |
| HWD6                       | 1.136                  | 1.093                  | 1.081                  | 1.00                   | -0.039 (-0.088, 0.002)  |
| HWD7                       | 1.092                  | 1.020                  | 1.080                  | 1.00                   | -0.008 (-0.039, 0.023)  |
| HWD8                       | 1.125                  | 1.086                  | 1.083                  | 1.00                   | -0.043 (-0.089, 0.001)  |
| HWD9                       | 1.160                  | 1.143                  | 1.081                  | 1.00                   | -0.065 (-0.133, 0.003)  |
| HWD10                      | 1.077                  | 0.997                  | 1.080                  | 1.00                   | 0.000 (-0.043, 0.043)   |
| HWD11                      | 1.157                  | 1.105                  | 1.079                  | 1.00                   | -0.027 (-0.1, 0.046)    |

|                     |       |       |       |      |                        |
|---------------------|-------|-------|-------|------|------------------------|
| HWD12               | 1.302 | 1.323 | 1.080 | 1.00 | -0.100 (-0.238, 0.038) |
| <b>NDVI inverse</b> |       |       |       |      |                        |
| HWD1                | 1.075 | 1.053 | 1.027 | 1.00 | -0.006 (-0.016, 0.004) |
| HWD2                | 1.064 | 1.041 | 1.025 | 1.00 | -0.002 (-0.013, 0.008) |
| HWD3                | 1.048 | 1.022 | 1.024 | 1.00 | 0.001 (-0.011, 0.014)  |
| HWD4                | 1.092 | 1.073 | 1.026 | 1.00 | -0.007 (-0.020, 0.007) |
| HWD5                | 1.111 | 1.092 | 1.025 | 1.00 | -0.006 (-0.023, 0.012) |
| HWD6                | 1.118 | 1.098 | 1.025 | 1.00 | -0.005 (-0.030, 0.019) |
| HWD7                | 1.102 | 1.083 | 1.025 | 1.00 | -0.006 (-0.024, 0.012) |
| HWD8                | 0.998 | 0.964 | 1.024 | 1.00 | 0.010 (-0.010, 0.031)  |
| HWD9                | 1.023 | 0.987 | 1.024 | 1.00 | 0.011 (-0.020, 0.041)  |
| HWD10               | 1.021 | 0.990 | 1.024 | 1.00 | 0.007 (-0.017, 0.030)  |
| HWD11               | 0.936 | 0.886 | 1.024 | 1.00 | 0.026 (-0.002, 0.054)  |
| HWD12               | 0.893 | 0.827 | 1.024 | 1.00 | 0.041 (0.007, 0.076)   |

HR: hazard ratio; RERI: relative excess risks due to interaction; CI, confidence interval; HWD: heatwave definition.

All models adjusted for maternal age, race/ethnicity, education, insurance, parity, infant sex, season; maternal address ZIP code was fitted as a random effect.

HR<sub>xy</sub>; x=heatwave, y=PM<sub>2.5</sub>; PM<sub>10</sub>; NO<sub>2</sub>; O<sub>3</sub>; NDVI inverse.

RERI calculated for 10 μg/m<sup>3</sup> increase in PM<sub>2.5</sub> and PM<sub>10</sub>; 10 ppb increase in NO<sub>2</sub> and O<sub>3</sub>; 0.1 unit decrease in NDVI. RERI = HR<sub>11</sub>-HR<sub>10</sub>-HR<sub>01</sub>+HR<sub>00</sub>

**Appendix D. RERI of heatwave and NDVI inverse, PM<sub>2.5</sub>, and O<sub>3</sub> on preterm birth in California, 2005-2013 with varying exposure windows.**

| HWD   | NDVI Inverse           |                         | PM <sub>2.5</sub>      |                        | O <sub>3</sub>        |                       |
|-------|------------------------|-------------------------|------------------------|------------------------|-----------------------|-----------------------|
|       | 4 days                 | 2 weeks                 | 4 days                 | 2 weeks                | 4 days                | 2 days                |
| HWD1  | -0.008 (-0.019, 0.003) | -0.008 (-0.017, 0.002)  | 0.033 (0.007, 0.060)   | 0.023 (-0.003, 0.050)  | 0.008 (0.001, 0.015)  | 0.003 (-0.005, 0.010) |
| HWD2  | -0.004 (-0.018, 0.009) | -0.003 (-0.013, 0.006)  | 0.028 (-0.005, 0.061)  | 0.012 (-0.016, 0.040)  | 0.01 (0.002, 0.018)   | 0.002 (-0.006, 0.009) |
| HWD3  | -0.011 (-0.030, 0.007) | -0.008 (-0.019, 0.003)  | 0.027 (-0.015, 0.069)  | 0.025 (-0.005, 0.056)  | 0.016 (0.007, 0.025)  | 0.007 (-0.001, 0.014) |
| HWD4  | -0.007 (-0.024, 0.009) | -0.012 (-0.024, -0.001) | 0.033 (-0.005, 0.072)  | 0.028 (-0.002, 0.059)  | 0.012 (0.003, 0.021)  | 0.010 (0.002, 0.017)  |
| HWD5  | -0.008 (-0.033, 0.016) | -0.012 (-0.026, 0.002)  | -0.005 (-0.061, 0.052) | 0.025 (-0.013, 0.062)  | 0.012 (0.0001, 0.024) | 0.011 (0.003, 0.019)  |
| HWD6  | -0.026 (-0.069, 0.017) | -0.014 (-0.033, 0.005)  | -0.003 (-0.094, 0.088) | -0.004 (-0.054, 0.047) | 0.007 (-0.011, 0.025) | 0.013 (0.004, 0.023)  |
| HWD7  | -0.006 (-0.030, 0.017) | -0.019 (-0.034, -0.003) | 0.012 (-0.040, 0.065)  | 0.015 (-0.024, 0.053)  | 0.014 (0.003, 0.025)  | 0.016 (0.009, 0.024)  |
| HWD8  | 0.005 (-0.026, 0.036)  | -0.008 (-0.027, 0.011)  | -0.002 (-0.078, 0.073) | -0.015 (-0.069, 0.039) | 0.006 (-0.012, 0.025) | 0.010 (-0.001, 0.020) |
| HWD9  | -0.005 (-0.062, 0.052) | -0.023 (-0.054, 0.009)  | -0.019 (-0.176, 0.139) | -0.035 (-0.118, 0.049) | 0.008 (-0.02, 0.036)  | 0.013 (0.000, 0.026)  |
| HWD10 | 0.013 (-0.015, 0.042)  | -0.016 (-0.038, 0.007)  | 0.003 (-0.064, 0.070)  | 0.012 (-0.041, 0.066)  | 0.027 (0.016, 0.039)  | 0.026 (0.017, 0.034)  |
| HWD11 | 0.028 (-0.012, 0.068)  | -0.001 (-0.031, 0.029)  | 0.039 (-0.069, 0.147)  | -0.046 (-0.134, 0.043) | 0.02 (-0.006, 0.046)  | 0.021 (0.007, 0.035)  |
| HWD12 | 0.015 (-0.090, 0.119)  | -0.002 (-0.050, 0.047)  | 0.370 (0.208, 0.531)   | -0.037 (-0.207, 0.133) | 0.04 (0.026, 0.054)   | 0.022 (0.001, 0.044)  |

| HWD   | PM <sub>10</sub>       |                        | NO <sub>2</sub>         |                         |
|-------|------------------------|------------------------|-------------------------|-------------------------|
|       | 4 days                 | 2 weeks                | 4 days                  | 2 days                  |
| HWD1  | 0.010 (-0.000, 0.019)  | 0.007 (-0.003, 0.016)  | -0.009 (-0.027, 0.01)   | -0.033 (-0.055, 0.011)  |
| HWD2  | 0.011 (-0.001, 0.022)  | 0.008 (-0.001, 0.017)  | -0.010 (-0.032, 0.011)  | -0.032 (-0.053, -0.011) |
| HWD3  | 0.009 (-0.005, 0.023)  | 0.011 (0.001, 0.021)   | -0.013 (-0.04, 0.015)   | -0.031 (-0.053, -0.009) |
| HWD4  | 0.007 (-0.006, 0.021)  | 0.012 (0.002, 0.022)   | -0.016 (-0.04, 0.009)   | -0.022 (-0.044, -0.001) |
| HWD5  | 0.001 (-0.019, 0.021)  | 0.010 (-0.001, 0.022)  | -0.021 (-0.057, 0.015)  | -0.032 (-0.058, -0.006) |
| HWD6  | -0.007 (-0.037, 0.024) | 0.003 (-0.012, 0.017)  | -0.063 (-0.125, -0.002) | -0.057 (-0.09, -0.024)  |
| HWD7  | 0.006 (-0.013, 0.024)  | 0.010 (-0.002, 0.022)  | -0.034 (-0.07, 0.002)   | -0.022 (-0.049, 0.005)  |
| HWD8  | 0.004 (-0.023, 0.03)   | 0.002 (-0.014, 0.018)  | -0.055 (-0.113, 0.004)  | -0.045 (-0.08, -0.009)  |
| HWD9  | 0.005 (-0.036, 0.046)  | -0.004 (-0.027, 0.018) | -0.051 (-0.153, 0.051)  | -0.080 (-0.134, -0.026) |
| HWD10 | 0.010 (-0.017, 0.037)  | 0.012 (-0.004, 0.028)  | -0.024 (-0.076, 0.028)  | -0.018 (-0.056, 0.021)  |
| HWD11 | 0.023 (-0.012, 0.058)  | -0.007 (-0.033, 0.054) | -0.042 (-0.152, 0.067)  | -0.066 (-0.131, -0.001) |
| HWD12 | 0.093 (0.045, 0.141)   | 0.012 (-0.031, 0.054)  | -0.052 (-0.292, 0.188)  | -0.109 (-0.215, -0.003) |

HWD: heatwave definition; RERI: relative excess risks due to interaction.

All models adjusted for maternal age, race/ethnicity, education, insurance, parity, infant sex, season; maternal address ZIP code was fitted as a random effect.

RERI calculated for 10  $\mu\text{g}/\text{m}^3$  increase in PM<sub>2.5</sub> and PM<sub>10</sub>; 10 parts per billion (ppb) increase in O<sub>3</sub> and NO<sub>2</sub>; 0.1 unit decrease in NDVI.

**Appendix E. RERI of heatwave and chronic exposure to air pollution on preterm birth in California, 2005-2013.**

| HWD   | RERI (95% CI)          |                       |                       |                       |
|-------|------------------------|-----------------------|-----------------------|-----------------------|
|       | PM <sub>2.5</sub>      | PM <sub>10</sub>      | O <sub>3</sub>        | NO <sub>2</sub>       |
| HWD1  | 0.078 (0.046, 0.110)   | 0.049 (0.04, 0.059)   | 0.025 (0.018, 0.031)  | 0.158 (0.137, 0.178)  |
| HWD2  | 0.062 (0.026, 0.098)   | 0.039 (0.028, 0.05)   | 0.019 (0.012, 0.027)  | 0.143 (0.119, 0.166)  |
| HWD3  | 0.075 (0.033, 0.116)   | 0.044 (0.032, 0.057)  | 0.023 (0.016, 0.031)  | 0.143 (0.116, 0.170)  |
| HWD4  | 0.054 (0.012, 0.096)   | 0.039 (0.026, 0.052)  | 0.023 (0.016, 0.031)  | 0.138 (0.111, 0.165)  |
| HWD5  | 0.048 (-0.007, 0.103)  | 0.032 (0.015, 0.049)  | 0.026 (0.018, 0.035)  | 0.134 (0.099, 0.17)   |
| HWD6  | 0.023 (-0.053, 0.100)  | 0.021 (-0.033, 0.045) | 0.025 (0.014, 0.036)  | 0.101 (0.05, 0.151)   |
| HWD7  | 0.083 (0.027, 0.138)   | 0.049 (0.034, 0.065)  | 0.030 (0.022, 0.038)  | 0.146 (0.11, 0.182)   |
| HWD8  | 0.018 (-0.067, 0.103)  | 0.032 (0.008, 0.056)  | 0.025 (0.014, 0.036)  | 0.109 (0.055, 0.163)  |
| HWD9  | -0.018 (-0.152, 0.116) | 0.004 (-0.038, 0.046) | 0.023 (0.005, 0.040)  | 0.081 (-0.004, 0.167) |
| HWD10 | 0.112 (0.034, 0.190)   | 0.055 (0.035, 0.076)  | 0.033 (0.025, 0.042)  | 0.186 (0.135, 0.237)  |
| HWD11 | 0.045 (-0.096, 0.186)  | 0.034 (-0.004, 0.073) | 0.028 (0.010, 0.047)  | 0.126 (0.033, 0.219)  |
| HWD12 | 0.066 (-0.192, 0.323)  | 0.034 (-0.03, 0.097)  | 0.030 (-0.004, 0.065) | 0.039 (-0.138, 0.215) |

HWD: heatwave definition; RERI: relative excess risks due to interaction; CI, confidence interval.

All models adjusted for maternal age, race/ethnicity, education, insurance, parity, infant sex, season; maternal address ZIP code was fitted as a random effect.

Chronic exposure defined as average concentration over full gestational period.

RERI calculated for 10  $\mu\text{g}/\text{m}^3$  increase in PM<sub>2.5</sub> and PM<sub>10</sub>; 10 parts per billion (ppb) increase in O<sub>3</sub> and NO<sub>2</sub>.

**Appendix F. RERI of heatwave and NDVI inverse on preterm birth in California, 2005-2013, restricted to urban zip codes.**

| <b>HWD</b> | <b>RERI (95% CI)</b>   |
|------------|------------------------|
| HWD1       | -0.007 (-0.018, 0.004) |
| HWD2       | 0.000 (-0.012, 0.012)  |
| HWD3       | 0.000 (-0.015, 0.014)  |
| HWD4       | -0.005 (-0.020, 0.010) |
| HWD5       | -0.008 (-0.029, 0.012) |
| HWD6       | -0.006 (-0.033, 0.022) |
| HWD7       | -0.009 (-0.030, 0.012) |
| HWD8       | 0.007 (-0.018, 0.032)  |
| HWD9       | 0.012 (-0.022, 0.046)  |
| HWD10      | 0.002 (-0.027, 0.030)  |
| HWD11      | 0.023 (-0.012, 0.058)  |
| HWD12      | 0.045 (0.009, 0.080)   |

HWD: heatwave definition; RERI: relative excess risks due to interaction; CI, confidence interval.

All models adjusted for maternal age, race/ethnicity, education, insurance, parity, infant sex, season; maternal address ZIP code was fitted as a random effect.

RERI calculated for 0.1 unit decrease in NDVI.

Urban defined as RUCA < 3.0 (at least 30% commute to urban area for work).

**Appendix G. RERI of heatwave and lack of green space on preterm birth in California, 2005-2013, green space measured by tree canopy.**

| <b>HWD</b> | <b>RERI (95% CI)</b>         |
|------------|------------------------------|
| HWD1       | -0.00024 (-0.00136, 0.00087) |
| HWD2       | -0.00013 (-0.0014, 0.00114)  |
| HWD3       | 0.00007 (-0.0014, 0.00153)   |
| HWD4       | 0.00013 (-0.00122, 0.00149)  |
| HWD5       | 0.00038 (-0.00131, 0.00207)  |
| HWD6       | -0.00029 (-0.00343, 0.00286) |
| HWD7       | 0.00033 (-0.00139, 0.00205)  |
| HWD8       | 0.00032 (-0.00214, 0.00277)  |
| HWD9       | -0.00025 (-0.00526, 0.00476) |
| HWD10      | 0.00063 (-0.00152, 0.00278)  |
| HWD11      | 0.00138 (-0.00071, 0.00347)  |
| HWD12      | 0.00202 (-0.00001, 0.00406)  |

HWD: heatwave definition; RERI: relative excess risks due to interaction; CI, confidence interval.

All models adjusted for maternal age, race/ethnicity, education, insurance, parity, infant sex, season; maternal address ZIP code was fitted as a random effect.

RERI calculated for 1 unit decrease in tree canopy percentage.



**Appendix H. RERI of heatwave and air pollution, NDVI inverse stratified by preterm birth subgroups in California, 2005-2013.**

| <b>HWD</b>              | <b>RERI (95% CI)</b>   |                        |                         |
|-------------------------|------------------------|------------------------|-------------------------|
|                         | <b>Extremely PTB</b>   | <b>Very PTB</b>        | <b>Late PTB</b>         |
| <b>PM<sub>2.5</sub></b> |                        |                        |                         |
| HWD1                    | -0.045 (-0.189, 0.10)  | -0.023 (-0.118, 0.073) | 0.054 (0.028, 0.079)    |
| HWD2                    | -0.045 (-0.211, 0.122) | -0.075 (-0.193, 0.043) | 0.049 (0.019, 0.078)    |
| HWD3                    | 0.017 (-0.156, 0.189)  | -0.033 (-0.169, 0.102) | 0.056 (0.021, 0.09)     |
| HWD4                    | -0.090 (-0.299, 0.119) | -0.035 (-0.163, 0.094) | 0.061 (0.028, 0.093)    |
| HWD5                    | -0.299 (-0.681, 0.082) | -0.004 (-0.166, 0.159) | 0.059 (0.016, 0.104)    |
| HWD6                    | -0.471 (-1.148, 0.206) | -0.217 (-0.540, 0.107) | 0.067 (0.01, 0.124)     |
| HWD7                    | -0.305 (-0.70, 0.090)  | -0.042 (-0.218, 0.133) | 0.067 (0.025, 0.109)    |
| HWD8                    | -0.299 (-0.859, 0.261) | -0.037 (-0.279, 0.205) | 0.049 (-0.011, 0.107)   |
| HWD9                    | -0.448 (-1.57, 0.674)  | -0.423 (-1.117, 0.270) | 0.078 (-0.015, 0.172)   |
| HWD10                   | -0.142 (-0.576, 0.291) | -0.056 (-0.302, 0.191) | 0.052 (-0.002, 0.106)   |
| HWD11                   | -0.571 (-1.926, 0.783) | -0.215 (-0.774, 0.344) | 0.054 (-0.034, 0.141)   |
| HWD12                   | -0.846 (-4.162, 2.47)  | -1.102 (-3.55, 1.34)   | 0.121 (-0.077, 0.32)    |
| <b>PM<sub>10</sub></b>  |                        |                        |                         |
| HWD1                    | -0.002 (-0.047, 0.042) | 0.002 (-0.03, 0.034)   | 0.012 (0.003, 0.021)    |
| HWD2                    | -0.008 (-0.056, 0.041) | -0.029 (-0.069, 0.011) | 0.008 (-0.001, 0.0179)  |
| HWD3                    | 0.016 (-0.028, 0.06)   | -0.022 (-0.068, 0.025) | 0.011 (0.001, 0.022)    |
| HWD4                    | -0.038 (-0.107, 0.03)  | -0.003 (-0.044, 0.037) | 0.009 (-0.002, 0.0197)  |
| HWD5                    | -0.072 (-0.178, 0.035) | -0.005 (-0.057, 0.047) | 0.004 (-0.009, 0.018)   |
| HWD6                    | -0.094 (-0.261, 0.073) | -0.082 (-0.193, 0.028) | 0.003 (-0.013, 0.02)    |
| HWD7                    | -0.053 (-0.155, 0.048) | -0.037 (-0.104, 0.03)  | 0.013 (0.00, 0.025)     |
| HWD8                    | -0.059 (-0.197, 0.08)  | -0.010 (-0.083, 0.063) | 0.002 (-0.015, 0.019)   |
| HWD9                    | -0.197 (-0.627, 0.232) | -0.127 (0.35, 0.096)   | 0.003 (-0.019, 0.026)   |
| HWD10                   | -0.079 (-0.26, 0.102)  | -0.014 (-0.096, 0.068) | 0.010 (-0.006, 0.026)   |
| HWD11                   | -0.084 (-0.372, 0.204) | -0.023 (-0.16, 0.113)  | 0.005 (-0.018, 0.029)   |
| HWD12                   | 0.090 (-0.071, 0.251)  | 0.013 (-0.229, 0.256)  | 0.046 (-0.008, 0.1)     |
| <b>O<sub>3</sub></b>    |                        |                        |                         |
| HWD1                    | 0.023 (-0.01, 0.056)   | -0.021 (-0.053, 0.01)  | 0.007 (0.00, 0.015)     |
| HWD2                    | 0.015 (-0.018, 0.049)  | -0.013 (-0.044, 0.019) | 0.006 (-0.001, 0.014)   |
| HWD3                    | 0.024 (-0.004, 0.052)  | -0.011 (-0.047, 0.026) | 0.010 (0.002, 0.018)    |
| HWD4                    | 0.021 (-0.012, 0.054)  | 0.003 (-0.029, 0.035)  | 0.009 (0.001, 0.017)    |
| HWD5                    | -0.002 (-0.055, 0.051) | 0.022 (-0.009, 0.052)  | 0.009 (-0.002, 0.019)   |
| HWD6                    | -0.006 (-0.084, 0.072) | -0.032 (-0.109, 0.045) | 0.012 (0.001, 0.024)    |
| HWD7                    | 0.014 (-0.031, 0.06)   | 0.012 (-0.026, 0.049)  | 0.017 (0.008, 0.026)    |
| HWD8                    | 0.026 (-0.002, 0.054)  | -0.004 (-0.065, 0.057) | 0.007 (-0.006, 0.021)   |
| HWD9                    | 0.016 (-0.078, 0.089)  | -0.078 (-0.252, 0.096) | 0.013 (-0.004, 0.029)   |
| HWD10                   | 0.007 (-0.073, 0.087)  | -0.013 (-0.088, 0.062) | 0.024 (0.015, 0.034)    |
| HWD11                   | 0.013 (-0.069, 0.095)  | -0.017 (-0.147, 0.114) | 0.023 (0.007, 0.039)    |
| HWD12                   | 0.018 (-0.208, 0.244)  | -0.061 (-0.399, 0.277) | 0.018 (-0.018, 0.054)   |
| <b>NO<sub>2</sub></b>   |                        |                        |                         |
| HWD1                    | -0.042 (-0.153, 0.069) | -0.067 (-0.141, 0.008) | -0.027 (-0.048, -0.005) |
| HWD2                    | -0.026 (-0.142, 0.089) | -0.060 (-0.139, 0.019) | -0.036 (-0.059, -0.013) |
| HWD3                    | -0.013 (-0.139, 0.112) | -0.036 (-0.125, 0.053) | -0.026 (-0.052, 0)      |
| HWD4                    | -0.034 (-0.165, 0.096) | -0.060 (-0.149, 0.03)  | -0.019 (-0.044, 0.006)  |
| HWD5                    | -0.100 (-0.287, 0.087) | -0.030 (-0.138, 0.078) | -0.033 (-0.066, -0.001) |
| HWD6                    | -0.141 (-0.418, 0.136) | -0.113 (-0.283, 0.057) | -0.050 (-0.095, -0.005) |
| HWD7                    | -0.074 (-0.264, 0.116) | -0.052 (-0.172, 0.067) | -0.016 (-0.048, 0.017)  |
| HWD8                    | -0.135 (0.422, 0.152)  | -0.061 (-0.226, 0.105) | -0.056 (-0.105, -0.008) |
| HWD9                    | -0.163 (-0.626, 0.3)   | -0.291 (-0.646, 0.064) | -0.073 (-0.147, 0.001)  |
| HWD10                   | -0.234 (-0.614, 0.146) | -0.042 (-0.213, 0.129) | -0.003 (-0.049, 0.042)  |
| HWD11                   | -0.014 (-0.386, 0.358) | -0.097 (-0.402, 0.209) | -0.047 (0.129, 0.034)   |

|             |                        |                        |                        |
|-------------|------------------------|------------------------|------------------------|
| HWD12       | 0.095 (-0.413, 0.604)  | -0.379 (-1.119, 0.361) | -0.135 (-0.293, 0.023) |
| <b>NDVI</b> |                        |                        |                        |
| HWD1        | 0.001 (-0.041, 0.043)  | 0.013 (-0.016, 0.041)  | -0.008 (-0.019, 0.002) |
| HWD2        | 0.011 (-0.029, 0.05)   | 0.012 (-0.019, 0.043)  | -0.005 (-0.016, 0.007) |
| HWD3        | 0.002 (-0.049, 0.054)  | 0.017 (-0.018, 0.052)  | -0.001 (-0.015, 0.013) |
| HWD4        | -0.032 (-0.114, 0.05)  | -0.010 (-0.056, 0.037) | -0.005 (-0.019, 0.008) |
| HWD5        | 0.010 (-0.048, 0.067)  | 0.004 (-0.048, 0.056)  | -0.008 (-0.027, 0.011) |
| HWD6        | 0.003 (-0.097, 0.103)  | 0.034 (-0.007, 0.075)  | -0.012 (-0.041, 0.016) |
| HWD7        | -0.029 (-0.142, 0.084) | -0.008 (-0.071, 0.055) | -0.006 (-0.025, 0.013) |
| HWD8        | 0.014 (-0.053, 0.081)  | 0.030 (-0.016, 0.076)  | 0.008 (-0.014, 0.031)  |
| HWD9        | 0.038 (0.013, 0.063)   | 0.034 (-0.026, 0.095)  | 0.004 (-0.032, 0.041)  |
| HWD10       | 0.021 (-0.054, 0.095)  | 0.039 (0.003, 0.075)   | 0.000 (-0.027, 0.028)  |
| HWD11       | 0.025 (-0.019, 0.068)  | 0.051 (0.024, 0.078)   | 0.019 (-0.016, 0.054)  |
| HWD12       | 0.042 (-0.049, 0.133)  | 0.050 (0.016, 0.084)   | 0.031 (-0.019, 0.081)  |

HWD: heatwave definition; RERI: relative excess risks due to interaction; CI, confidence interval; PTB, preterm birth.

All models adjusted for maternal age, race/ethnicity, education, insurance, parity, infant sex, season; maternal address ZIP code was fitted as a random effect.

RERI calculated for 10  $\mu\text{g}/\text{m}^3$  increase in  $\text{PM}_{2.5}$  and  $\text{PM}_{10}$ ; 10 parts per billion (ppb) increase in  $\text{O}_3$  and  $\text{NO}_2$ ; 0.1 unit decrease in NDVI.
